# Supplementary material
Source: Springer Nature journal article supplement (https://www.springermedizin.de/resource/supplementary/12985_2010_978_MOESM4_ESM.pdf/9608870)

## Phichit

Chicken/Thailand/PC-340/08

## Sukhothai

Chicken/Thailand/ST-351/08

Chicken/Thailand/NIAH-114843/08

## Nakhon Sawan

Chicken/Thailand/NS-339/08

Chicken/Thailand/NS-341/08

Chicken/Thailand/NS-342/08

## Uthai Thani

Chicken/Thailand/NIAH-115067/08

Chicken/Thailand/CU-354/08

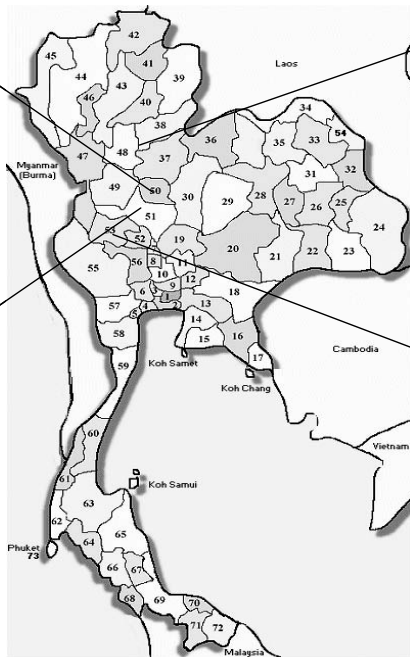

Supplement: MOESM4 [file 9608870]
